# Supplementary material
Source: publisher figshare collection journal article supplement (https://tandf.figshare.com/ndownloader/files/14378765)
Supplement: Supplementary file 1 [file 14378765]

**Table S2. Location of 5’ *POTEC/E/F* CpG sites used for analyses**

| **Gene** | **GENCODE Transcript1** | **Ilumina 450K CpG site Probe ID** | **Position relative to predicted transcriptional start site (TSS)** | **Putative genomic region** |
| --- | --- | --- | --- | --- |
| ***POTEC*** | ENST00000358970.9 | cg06767136 | -16 | proximal promoter |
| cg06222979 | -324 | distal promoter |
| cg18934713 | -565 | distal promoter |
| cg03953077 | -623 | distal promoter |
|  |  |  |  |  |
| ***POTEE*** | ENST00000356920.9 | cg00574114 | -8463 | enhancer |
| cg13363575 | -8317 | enhancer |
|  |  |  |  |  |
| ***POTEF*** | ENST00000409914.6 | cg09125754 | 81 | 5'-UTR |
| cg10204214 | -55 | proximal promoter |
| cg22441237 | -140 | proximal promoter |
| cg06767136 | -379 | proximal promoter |

1 https://www.gencodegenes.org/
